# Supplementary material for: Guiding kinetic trajectories between jammed and unjammed states in 2D colloidal nanocrystal-polymer assemblies with zwitterionic ligands
Source: PubMed Central journal article supplement — Sci Adv. 2018 Aug 3;4(8):eaap8045. doi: 10.1126/sciadv.aap8045 (PMC6070361; doi:10.1126/sciadv.aap8045), 2018-08-03
Supplement: aap8045_SM.pdf [file aap8045_SM.pdf]

## Supplementary Materials for

### Guiding kinetic trajectories between jammed and unjammed states in 2D colloidal nanocrystal-polymer assemblies with zwitterionic ligands

Ziyi Zhang, Yufeng Jiang, Caili Huang, Yu Chai, Elise Goldfine, Feng Liu, Wenqian Feng, Joe Forth, Teresa E. Williams, Paul D. Ashby, Thomas P. Russell\*, Brett A. Helms\*

\*Corresponding author. Email: tom.p.russell@gmail.com (T.P.R.); bahelms@lbl.gov (B.A.H.)

Published 11 May 2018, *Sci. Adv.* 4, eaap8045 (2018)  
DOI: 10.1126/sciadv.aap8045

#### This PDF file includes:

- Fig. S1. Interfacial tension as a function of time for a system configured with both Fe<sub>3</sub>O<sub>4</sub> NCs and 3K-PDMS-NH<sub>2</sub>.
- Fig. S2. Interfacial tension as a function of time for a system without NCPSs.
- Fig. S3. Interfacial tension as a function of time for a system configured with only 3K-PDMS-NH<sub>2</sub>.
- Fig. S4. Interfacial tension as a function of time for a system configured with only zwitterionic ligand **1**.
- Fig. S5. Interfacial tension as a function of time for a system configured with zwitterionic ligand **1** and 3K-PDMS-NH<sub>2</sub>.
- Fig. S6. Zwitterionic ligand binding to naked NC surfaces.
- Fig. S7. Steady-state interfacial tension as a function of zwitterionic ligand concentration.

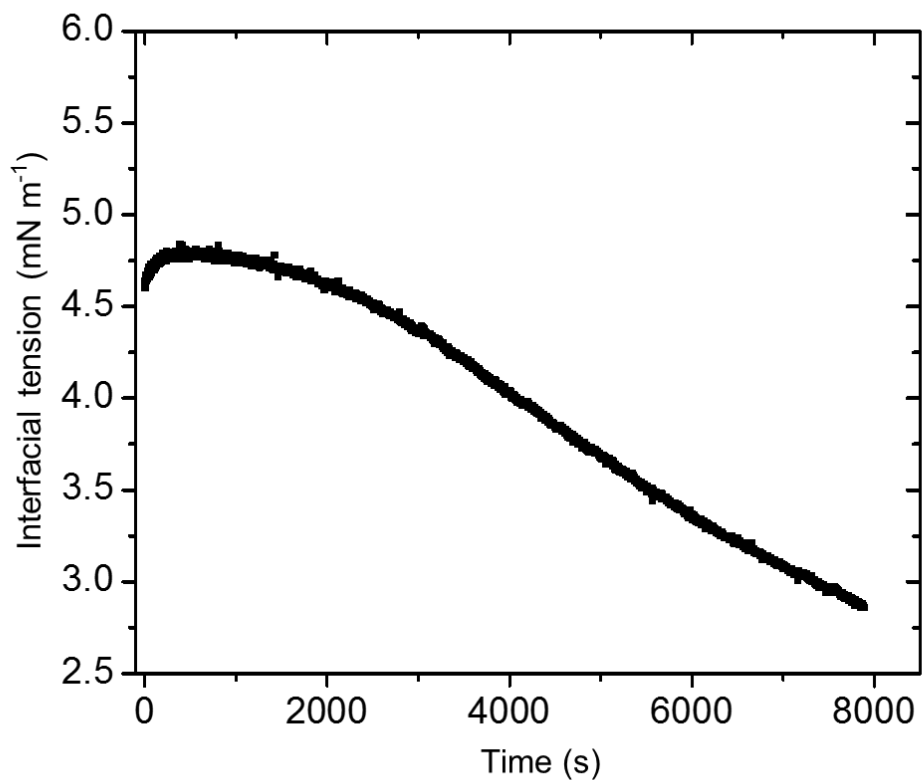

**Fig. S1. Interfacial tension as a function of time for a system configured with both  $\text{Fe}_3\text{O}_4$  NCs and 3K-PDMS- $\text{NH}_2$ .** A pendant droplet of DMF with  $0.5 \text{ mg mL}^{-1}$   $\text{Fe}_3\text{O}_4$  NCs is suspended in a bath of PDMS/dodecane with 5% w/w 3K-PDMS- $\text{NH}_2$ . After NCPS monolayer formation reached steady state, the interfacial tension decreased to  $\gamma_{\text{polar/non-polar}} = 2.85 \text{ mN m}^{-1}$ .

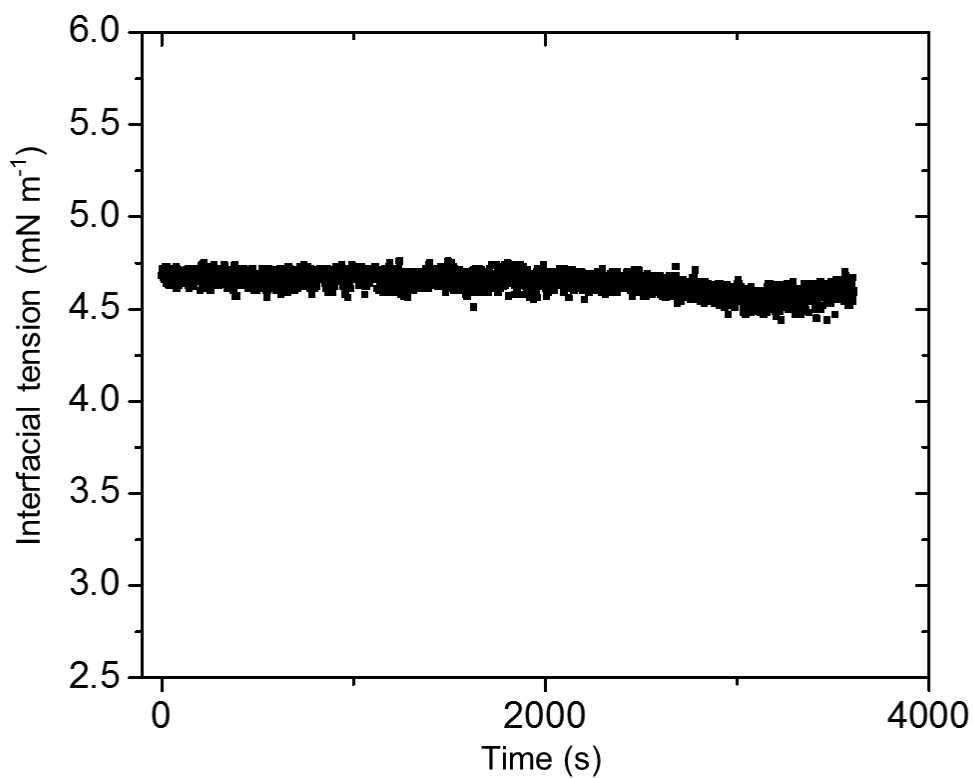

**Fig. S2. Interfacial tension as a function of time for a system without NCPSs.** A pendant droplet of DMF suspended in a bath of PDMS/dodecane. Without introducing anything in both phase, the system keeps at a steady state, the interfacial tension is  $4.65 \text{ mN m}^{-1}$ .

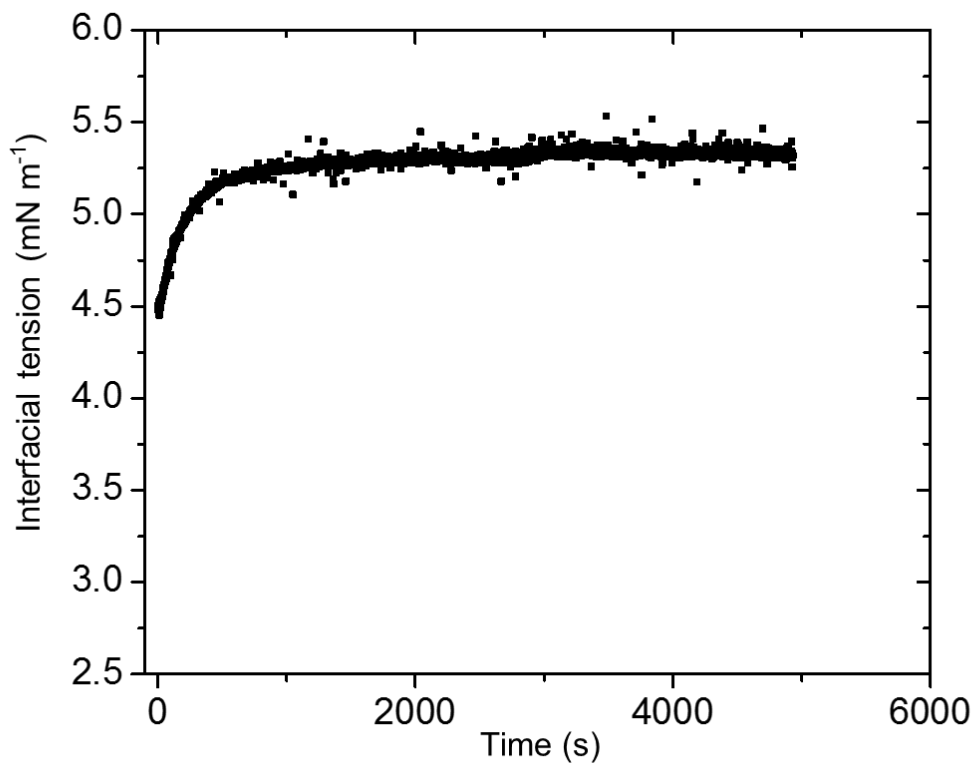

**Fig. S3. Interfacial tension as a function of time for a system configured with only 3K-PDMS-NH<sub>2</sub>.** A pendant droplet of pure DMF suspended in a bath of PDMS/dodecane with 5% w/w 3K-PDMS-NH<sub>2</sub>. After the system reached steady state, the interfacial tension increased to  $\gamma_{\text{polar/nonpolar}} = 5.25 \text{ mN m}^{-1}$ .

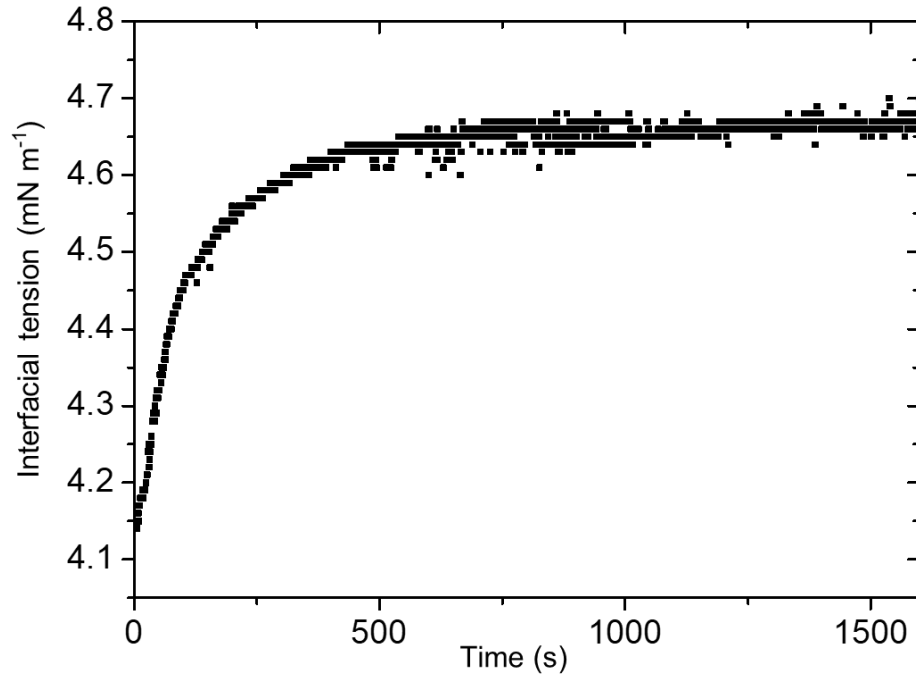

**Fig. S4. Interfacial tension as a function of time for a system configured with only zwitterionic ligand 1.** A pendant droplet of DMF with  $0.5 \text{ mg mL}^{-1}$  Ligand **1** suspended in a bath of PDMS/dodecane. After the system reached steady state, the interfacial tension increased to  $\gamma_{\text{polar/nonpolar}} = 4.67 \text{ mN m}^{-1}$ .

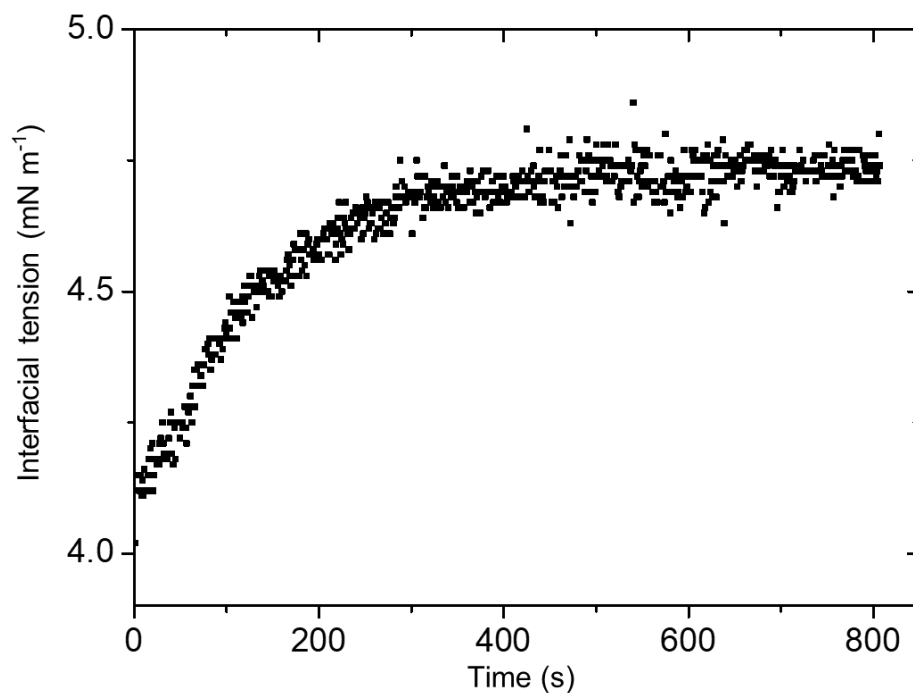

**Fig. S5. Interfacial tension as a function of time for a system configured with zwitterionic ligand 1 and 3K-PDMS-NH<sub>2</sub>.** A pendant droplet of DMF with 0.5 mg mL<sup>-1</sup> Ligand 1 suspended in a bath of PDMS/dodecane with 5% w/w 3K-PDMS-NH<sub>2</sub>. After the system reached steady state, the interfacial tension increased to  $\gamma_{\text{polar/nonpolar}} = 4.74 \text{ mN m}^{-1}$ .

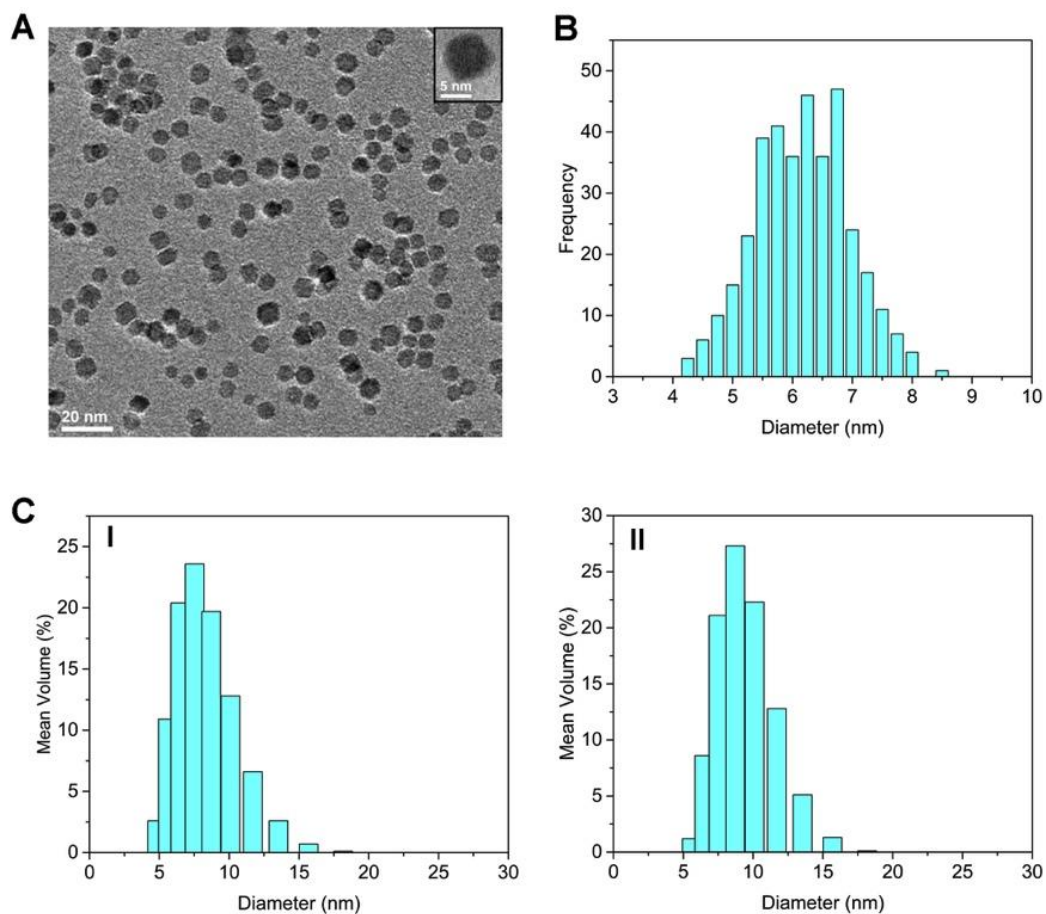

**Fig. S6. Zwitterionic ligand binding to naked NC surfaces.** (A) TEM of naked  $\text{Fe}_3\text{O}_4$  NCs; (B) Size-Distribution of naked  $\text{Fe}_3\text{O}_4$  NCs calculated from TEM images (sample size  $\sim 400$  NCs); (C) Size-Distribution of naked  $\text{Fe}_3\text{O}_4$  NCs dispersed in DMF calculated from DLS data in the absence (I) or in the presence of zwitterionic ligand **1** (II).

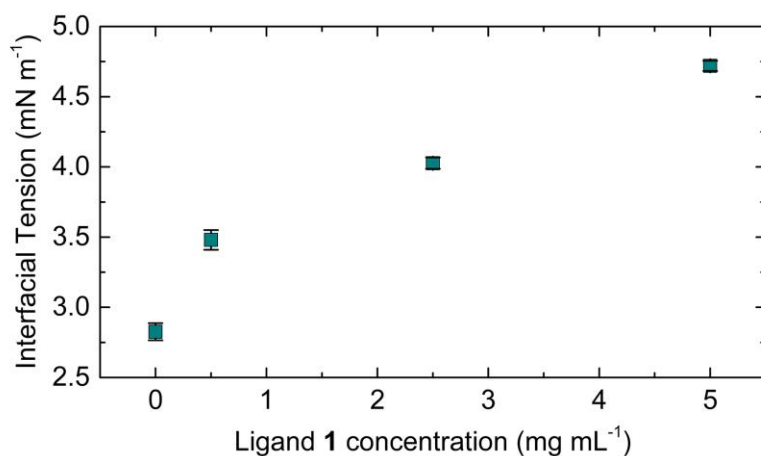

**Fig. S7. Steady-state interfacial tension as a function of zwitterionic ligand concentration.** Interfacial tension at the onset of wrinkling in interfacial films for pendent droplets of DMF suspended in a bath of PDMS/dodecane for systems configured with 3K-PDMS-NH<sub>2</sub> (5% *w/w*), Fe<sub>3</sub>O<sub>4</sub> NCs (0.5 mg mL<sup>-1</sup>), and varying concentrations of zwitterionic ligand **1** (0–5.0 mg mL<sup>-1</sup>). Small standard deviations indicate excellent reproducibility.
